# Supplementary material
Source: HighWire-hosted journal article supplement (https://jitc.bmj.com/content/8/1/e000162)
Supplement: inline-supplementary-material-1 [file inline-supplementary-material-1.xlsx]

## Sheet: CCC-EMN
Supplementary Table S1. Clinico-pathological Parameters.
CCC-EMN-Cohort [n=187]: n(%)			TCGA-Cohort [n=407]: n(%)			Adjuvant Chemotherapy Cohort [n=125]: n(%)
pN-Stage			pN-Stage			pN-Stage
pN0	121 (65%)		pN0	237 (58%)		pN0	52 (42%)
pN1	16 (8%)		pN1	45 (11%)		pN1	19 (15%)
pN2	35 (19%)		pN2	83 (20%)		pN2	41 (33%)
pNX	15 (8%)		pNX	42 (10%)		pNX	13 (10%)
pT-Stage			pT-Stage			pT-Stage
pT2	53 (28%)		pT2	123 (30%)		pT2	17 (14%)
pT3	91 (49%)		pT3	193 (47%)		pT3	64 (51%)
pT4	43 (23%)		pT4	58 (14%)		pT4	33 (26%)
Concomitant urothelial CIS			pTX	33 (8%)		pTX	11 (9%)
CIS: present	125 (67%)		Concomitant urothelial CIS			Concomitant urothelial CIS
CIS: absent	62 (33%)		CIS: present	n.a.		CIS: present	n.a.
Lymphovascular Invasion (L)			CIS: absent	n.a.		CIS: absent	n.a.
L0	87 (47%)		Lymphovascular Invasion (L)			Lymphovascular Invasion (L)
L1	100 (53%)		L0	129 (32%)		L0	32 (26%)
Blood Vessel Invasion (V)			L1	151 (37%)		L1	73 (58%)
V0	133 (71%)		LX	127 (31%)		LX	20 (16%)
V1	54 (29%)		Blood Vessel Invasion (V)			Blood Vessel Invasion (V)
Perineural Sheath Invasion (Pn)			V0	n.a.		V0	n.a.
Pn0	123 (66%)		V1	n.a.		V1	n.a.
Pn1	64 (34%)		Perineural Sheath Invasion (Pn)			Perineural Sheath Invasion (Pn)
WHO-Grading 1973			Pn0	n.a.		Pn0	n.a.
G1	0 (0%)		Pn1	n.a.		Pn1	n.a.
G2	6 (3%)		WHO-Grading 1973			WHO-Grading 1973
G3	181 (97%)		G1	n.a.		G1	n.a.
WHO-Grading 2004/2016			G2	n.a.		G2	n.a.
Low Grade	0 (0%)		G3	n.a.		G3	n.a.
High Grade	187 (100%)		WHO-Grading 2004/2016			WHO-Grading 2004/2016
Adjuvant chemotherapy (Platinum-containing)			Low Grade	21 (5%)		Low Grade	0 (0%)
Yes	56 (30%)		High Grade	386 (95%)		High Grade	125 (100%)
No	131 (70%)		Adjuvant chemotherapy (Platinum-containing)			Adjuvant chemotherapy (Platinum-containing)
Adjuvant chemotherapy -Regimen			Yes	69 (17%)		Yes	125 (100%)
Cis-Platinum + Gemcitabine	48 (85.7%)		No	338 (83%)		No	0
Carbo-Platinum + Gemcitabine	8 (14.3%)		Adjuvant chemotherapy -Regimen			Adjuvant chemotherapy -Regimen
Adjuvant chemotherapy - Cycles			No further informations available			Cis-Platinum + Gemcitabine	48 (38.4%)
4 cycles	49 (87.5%)		Adjuvant chemotherapy - Cycles			Carbo-Platinum + Gemcitabine	8 (6.4%)
3 cycles	3 (5.4%)		No further informations available			No informations available (TCGA)	69 (55.2%)
2 cycles	4 (7.1%)		Gender			Adjuvant chemotherapy - Cycles
Gender			Female	300 (74%)		4 cycles	49 (39.2%)
Female	51 (27%)		Male	107 (26%)		3 cycles	3 (2.4%)
Male	136 (73%)		Age (a)			2 cycles	4 (3.2%)
Age (a)			Median	69		No informations available (TCGA)	69 (55.2%)
Median	69		Min.	34		Gender
Min.	37		Max.	90		Female	33
Max.	91					Male	92
						Age (a)
						Median	66
						Min.	41
						Max.	84

## Sheet: Tabelle1
							TCGA_WHOLE			n=407
							Survival time (months)			Overall survival censored		Disease specific survival censored
							Max.	165.9	months	Dead:	179	Disease specific death:				unknown
							Median	17.61	months	Alive:	228	No disease specific death/alive (censored):				unknown
							Min.	0	months
							Mean	26.65	months
							Gender	n		Age
							Male	300		Max.	90	years
							Female	107		Median	69	years
										Min.	34	years
										Mean	68.1	years
							pT-Stage
							pT1	4
							pT2	122
							pT3	193
							pT4	58
							pTX	33
							pN-Stage
							pN0	237
							pN1	45
							pN2	83
							pNX	42
							Grade WHO 2004/2016
							Low grade	21
							High grade	383
							N.A.	3
							Grade WHO 1973
							G1	n.a.
							G2	n.a.
							G3	n.a.
							Lymphovascular invasion
							L0	129
							L1	151
							LX	127
