# Supplementary material
Source: HighWire-hosted journal article supplement (https://jitc.bmj.com/content/8/1/e000162)
Supplement: inline-supplementary-material-2 [file inline-supplementary-material-2.xlsx]

## Sheet: Tabelle1
Table S1. Reference Sequences – Nanostring analysis for subtyping (CCC-EMN cohort).
HUGO Gene	Accession	Target Sequence	Function
SDHA	NM_004168.1	TGGAGGGGCAGGCTTGCGAGCTGCATTTGGCCTTTCTGAGGCAGGGTTTAATACAGCATGTGTTACCAAGCTGTTTCCTACCAGGTCACACACTGTTGCA	Housekeeping Gene
HPRT1	NM_000194.1	TGTGATGAAGGAGATGGGAGGCCATCACATTGTAGCCCTCTGTGTGCTCAAGGGGGGCTATAAATTCTTTGCTGACCTGCTGGATTACATCAAAGCACTG	Housekeeping Gene
KRT20	NM_019010.1	ACAGTCGTGCAAGAAGTAGTGGATGGCAAGGTCGTGTCATCTGAAGTCAAAGAGGTGGAAGAAAATATCTAAATAGCTACCAGAAGGAGATGCTGCTGAG	Luminal Differentiation Marker
KRT7	NM_005556.3	CCGCCTCCCAGACATCTTTGAGGCCCAGATTGCTGGCCTTCGGGGTCAGCTTGAGGCACTGCAGGTGGATGGGGGCCGCCTGGAGGCGGAGCTGCGGAGC	Luminal Differentiation Marker
GATA3	NM_001002295.1	GTGCATGACTCACTGGAGGACTTCCCCAAGAACAGCTCGTTTAACCCGGCCGCCCTCTCCAGACACATGTCCTCCCTGAGCCACATCTCGCCCTTCAGCC	Luminal Differentiation Marker
FGFR3	NM_022965.2	GGACCTGTATATTTGTAAAGCTATTTATGGGCCCCTGGCACTCTTGTTCCCACACCCCAACACTTCCAGCATTTAGCTGGCCACATGGCGGAGAGTTTTA	Luminal Differentiation Marker
CYP2J2	NM_000775.2	GAAAAATGGATTGATTATGTCAAGTGGCCAGGCATGGAAGGAGCAAAGAAGGTTCACTCTGACAGCACTAAGGAACTTTGGTTTAGGAAAGAAGAGCTTA	Luminal Differentiation Marker
ERBB2	NM_001005862.1	ACAGACACGTTTGAGTCCATGCCCAATCCCGAGGGCCGGTATACATTCGGCGCCAGCTGTGTGACTGCCTGTCCCTACAACTACCTTTCTACGGACGTGG	Luminal Differentiation Marker
ERBB3	NM_001005915.1	CCTGCAGTGGATTCGAGAAGTGACAGGCTATGTCCTCGTGGCCATGAATGAATTCTCTACTCTACCATTGCCCAACCTCCGCGTGGTGCGAGGGACCCAG	Luminal Differentiation Marker
CDH1	NM_004360.2	GAATTGCTCACATTTCCCAACTCCTCTCCTGGCCTCAGAAGACAGAAGAGAGACTGGGTTATTCCTCCCATCAGCTGCCCAGAAAATGAAAAAGGCCCAT	Epithelial-to-mesenchymal transition; ECM-remodeling/interaction
MYH11	NM_001040113.1	CTGCTAGAAAAATCACGGGCAATTCGCCAAGCCAGAGACGAGAGGACATTCCACATCTTTTACTACATGATTGCTGGAGCCAAGGAGAAGATGAGAAGTG	Epithelial-to-mesenchymal transition; ECM-remodeling/interaction
ACTG2	NM_001615.3	GGGCCCTCCATTGTCCACAGGAAGTGCTTCTAAAGTCAGAACAGGTTCTCCAAGGATCCCCTCGAGACTACTCTGTTACCAGTCATGAAACATTAAAACC	Epithelial-to-mesenchymal transition; ECM-remodeling/interaction
CNN1	NM_001299.4	GTTTGAGAACACCAACCATACACAGGTGCAGTCCACCCTCCTGGCTTTGGCCAGCATGGCGAAGACGAAAGGAAACAAGGTGAACGTGGGAGTGAAGTAC	Epithelial-to-mesenchymal transition; ECM-remodeling/interaction
MFAP4	NM_002404.1	AACATGCACCTCCTGACACTGAAGCAGAAGTATGAGCTGCGAGTGGACTTGGAGGACTTTGAGAACAACACGGCCTATGCCAAGTACGCTGACTTCTCCA	Epithelial-to-mesenchymal transition; ECM-remodeling/interaction
VIM	NM_003380.2	GAGGAGATGCTTCAGAGAGAGGAAGCCGAAAACACCCTGCAATCTTTCAGACAGGATGTTGACAATGCGTCTCTGGCACGTCTTGACCTTGAACGCAAAG	Epithelial-to-mesenchymal transition; ECM-remodeling/interaction
ZEB2	NM_001171653.1	GTTTGTGTTTCCTGGAGTGGCCGAAAGAGATCAGTTCTAACCTGCTCTGCAGGAATAACGGTCCTGCCTCCCGACACTCTTGGCGAGGTTTTTGTACAGT	Epithelial-to-mesenchymal transition; ECM-remodeling/interaction
SNAI2	NM_003068.3	GCGTTTTCCAGACCCTGGTTGCTTCAAGGACACATTAGAACTCACACGGGGGAGAAGCCTTTTTCTTGCCCTCACTGCAACAGAGCATTTGCAGACAGGT	Basal Differentiation Marker; Epithelial-to-mesenchymal transition; ECM-remodeling/interaction
CDH3	NM_001793.3	CCCTCGACCGTGAGGATGAGCAGTTTGTGAGGAACAACATCTATGAAGTCATGGTCTTGGCCATGGACAATGGAAGCCCTCCCACCACTGGCACGGGAAC	Basal Differentiation Marker; Epithelial-to-mesenchymal transition; ECM-remodeling/interaction
CD44	NM_001001392.1	ACACCATGGACAAGTTTTGGTGGCACGCAGCCTGGGGACTCTGCCTCGTGCCGCTGAGCCTGGCGCAGATCGATTTGAATATAACCTGCCGCTTTGCAGG	Basal Differentiation Marker; Epithelial-to-mesenchymal transition; ECM-remodeling/interaction
KRT5	NM_000424.2	CTGGTTCTCTTGCTCCACCAGGAACAAGCCACCATGTCTCGCCAGTCAAGTGTGTCCTTCCGGAGCGGGGGCAGTCGTAGCTTCAGCACCGCCTCTGCCA	Basal Differentiation Marker
KRT6A	NM_005554.3	GAGGAGAGAGGGAAGAGAAGCAGGACTAGGAATCAGGCTCGGGGCAGCAGCATTTGGAATGATGTGTACTGGGAATAAGACGACG	Basal Differentiation Marker
KRT6B	NM_005555.3	ACCATCCTGCCCATTATAGCTACACTCAGGAGTTCTCATCTGACAAGTCAGTTGTCCTGATCTTCTCTTGCAGTGTCCCTGAATGGCAAGTGATGTACCT	Basal Differentiation Marker
KRT6C	NM_173086.4	CTGGCCTCTAGTCTTCCCTGCTCTCCGAGGTAGAGCTGGGTATGGATGCTTAGTGCCCTCACTTCTCTCTGTCTATACCTGCCCCATCTGAGCACCCATT	Basal Differentiation Marker
