# Supplementary material
Source: HighWire-hosted journal article supplement (https://jitc.bmj.com/content/8/1/e000162)
Supplement: inline-supplementary-material-3 [file inline-supplementary-material-3.xlsx]

## Sheet: Overview_Variables
Table S2. Multivariable cox regression models of survival analyses.
The following tables summarize all included variables and coding. The following subsequent sheets summarize all back-and-forth selection models for multivariable cox-regression analysis as well as final models for survival analyses in Figure 2, 4 and 5.
Variable	Data type	Modeling Type
Survival time	numeric	continuous
Censor-Codes (DSS; OS)	numeric	nominal
Immune Typer	character	nominal
Specification:	Inflamed: High
	Inflamed: Low
	Uninflamed
pN-Stage	character	nominal
Specification:	pN0	no lymph node metastases
	pNX	no lmyph nodes assessable in lymph dissectates
	pN+	lymph node metastases present
pT-Stage	character	nominal
Specification:	pT2	Invasion to muscularis propria
	pT3	extravesical extension
	pT4	infiltration of other organs
WHO Grading 1973	character	nominal
Specification:	G1
	G2
	G3
WHO Grading 2016	character	nominal
Specification:	Low grade
	High grade
Lymphovascular Invasion	character	nominal
Specification:	L0	No lymphovascular Invasion
	LX	Lymphovascular Invasion not assessable
	L1	Lymphovascular Invasion present
Perineurial Sheath Invasion	character	nominal
Specification:	Pn0	No perineural sheath invasion
	Pn1	Perineural sheath invasion present
Blood Vessel Invasion	character	nominal
Specification:	V0	No blood vessel invasion present
	V1	Blood vessel invasion present
CIS	numeric	nominal
Specification:	0	CIS absent
	1	CIS present
Adjuvant chemotherapy	numeric	nominal
Specification:	0	No adjuvant chemotherapy
	1	Adjuvant chemotherapy applied
Gender	character	nominal
Specification:	male
	female
Age	numeric	continuous
Resection margin	character	nominal
Specification:	R0	complete excision, no residual tumor
	R1	incomplete excision, residual tumor (microscopic)
MDACC	character	nominal
Specification:	Basal
	Luminal
	Luminal p53-like
TCGA mRNA Subtypes	character	nominal
Specification:	Luminal papillary
	Luminal
	Luminal Infiltrated
	Basal squamous
	Neuronal-like

## Sheet: Fig2_DSS_Immunetyper
Ad Figure 2: Multivariable Cox Regression - Disease specific survival (DSS)
Median potential follow-up time (months)
Group	Median Time	Lower 95%-CI	Upper 95%-CI	25% Failures	75% Failures
Inflamed: High	41.13	31.27	76.53	25.9	78.27
Inflamed: Low	59.33	35.93	69.67	35.77	81.4
Uninflamed	71.27	60.4	81.1	42.2	81.9
Combined	61.3	51.8	71.07	31.27	82.67
Model Selection:
1) Step One: Univariable Cox-Regressions
Source	LogWorth	PValue	AICc	BIC
pN-Stage Summary	6.821	0	882.298	888.695	Included Variables: p≤0.20
pT-Stage Summary	5.268	1e-05	889.451	895.848
Immunetyper-Cluster	4.788	2e-05	891.659	898.056
Lymphocascular Invasion	4.219	6e-05	895.576	898.785
Perineurial Sheath Invasion	2.673	0.00212	902.228	905.437
Blood Vessel Invasion	2.131	0.0074	904.492	907.702
Gender	1.308	0.04921	907.798	911.007
WHO 1973 Grading	1.301	0.04999	907.824	911.034
MDACC	1.023	0.09482	909.403	918.965
Resection margin	0.816	0.15273	909.621	912.831
Concomitant CIS	0.649	0.22413	910.188	913.398	Dropped variables: p>0.20
Adjuvant chemotherapy	0.515	0.30533	910.615	913.825
Age	0.429	0.37275	910.872	914.081
WHO Grading 2016	0	1	All tumors were high grade (no parameter estimation possible)
2) Step Two: Backward selection; Multivariable Cox-Regression of included variables with p≤0.20 derived by univariable Cox-Regression
Multivariable Cox-Regression: Events (n): 97; Censorings (n): 90; Total (n): 187
Source	LogWorth	PValue	AICc	BIC
pN-Stage Summary	3.433	0.00037	870.261	915.92	Included Variables: p≤0.10
Immunetyper-Cluster	2.917	0.00121
pT-Stage Summary	2.281	0.00524
MDACC	0.516	0.30481			Dropped variables: p>0.10
Gender	0.503	0.31371
Perineurial Sheath Invasion	0.425	0.3759
Resection margin	0.192	0.64322
WHO 1973 Grading	0.185	0.65362
Blood Vessel Invasion	0.07	0.85178
Lymphocascular Invasion	0.05	0.89083
3) Step Three: Forward selection of significant variables from multivariable analysis (step 2 model) and non-significant variables from univariable analysis (step 1)
Multivariable Cox-Regression: Events (n): 97; Censorings (n): 90; Total (n): 187
Source	LogWorth	PValue	AICc	BIC
Immunetyper-Cluster	4.881	1e-05	857.278	885.341	Included Variables: p≤0.10
pN-Stage Summary	4.461	3e-05
pT-Stage Summary	4.144	7e-05
Adjuvant chemotherapy	1.125	0.07498
Age	0.067	0.85656			Dropped variables: p>0.10
Concomitant CIS	0.052	0.88761
4) Step four: Fitting of the final multivariable Model
Multivariable Cox-Regression: Events (n): 97; Censorings (n): 90; Total (n): 187
					Effect Likelihood Ratio Tests				Effect Wald Tests
Source	LogWorth	PValue	AICc	BIC	Nparm	DF	L-R ChiSquare	Prob>ChiSq	Nparm	DF	Wald ChiSquare	Prob>ChiSq
Immunetyper-Cluster	4.997	1e-05	852.933	874.925	2	2	23.0134	<.0001	2	2	20.6285	<.0001
pN-Stage Summary	4.54	3e-05			2	2	20.9059	<.0001	2	2	24.4089	<.0001
pT-Stage Summary	4.194	6e-05			2	2	19.312	<.0001	2	2	20.4225	<.0001
Adjuvant chemotherapy	1.454	0.03514			1	1	4.43823	0.0351	1	1	4.26762	0.0388
Model	-LogLikelihood	ChiSquare	DF	Prob>Chisq
Difference	35.6686	71.3372	7	<.0001
Full	419.154
Reduced	454.822
Parameter Estimates
Term	Estimate	Std Error	Lower 95%	Upper 95%
pT-Stage Summary[pT3-pT2]	0.385822	0.284519	-0.157409	0.96427
pT-Stage Summary[pT4-pT3]	0.960154	0.251155	0.463183	1.45092
pN-Stage Summary[pN+]	-0.134172	0.155589	-0.442004	0.171133
pN-Stage Summary[pN0]	-0.745403	0.159667	-1.05805	-0.430066
Adjuvant chemotherapy[No]	0.249286	0.120672	0.0171023	0.491736
Immunetyper-Cluster[Inflamed: High]	-0.588142	0.228988	-1.07734	-0.169898
Immunetyper-Cluster[Inflamed: Low]	-0.121092	0.185994	-0.492059	0.242577
Mutlivariable Hazard Ratios
pT-Stage
Level1	/Level2	Hazard Ratio	Prob>Chisq	Lower 95%	Upper 95%
pT3	pT2	1.47082	0.1667	0.854355	2.62287
pT4	pT2	3.84193	<.0001	2.03845	7.41527
pT4	pT3	2.6121	0.0002	1.58912	4.26705
pT2	pT3	0.679892	0.1667	0.381261	1.17047
pT2	pT4	0.260286	<.0001	0.134857	0.490569
pT3	pT4	0.382834	0.0002	0.234354	0.629278
pN-Stage
Level1	/Level2	Hazard Ratio	Prob>Chisq	Lower 95%	Upper 95%
pN0	pN+	0.542682	0.012	0.339806	0.872735
pNX	pN+	2.75591	0.0039	1.40955	5.12428
pNX	pN0	5.07831	<.0001	2.56732	9.5364
pN+	pN0	1.8427	0.012	1.14582	2.94285
pN+	pNX	0.362857	0.0039	0.195149	0.709445
pN0	pNX	0.196916	<.0001	0.104861	0.389512
Immune Typer
Level1	/Level2	Hazard Ratio	Prob>Chisq	Lower 95%	Upper 95%
Inflamed: Low	Inflamed: High	1.59528	0.2161	0.767077	3.55619
Uninflamed	Inflamed: High	3.65968	<.0001	1.94786	7.64434
Uninflamed	Inflamed: Low	2.29406	0.0007	1.40886	3.86099
Inflamed: High	Inflamed: Low	0.626849	0.2161	0.2812	1.30365
Inflamed: High	Uninflamed	0.273248	<.0001	0.130816	0.513383
Inflamed: Low	Uninflamed	0.435908	0.0007	0.259001	0.709795
Adjuvant Chemotherapy
Level1	/Level2	Hazard Ratio	Prob>Chisq	Lower 95%	Upper 95%
Yes	No	0.607397	0.0351	0.37401	0.966374
No	Yes	1.64637	0.0351	1.0348	2.67372

## Sheet: Fig2_DFS_Immunetyper
Ad Figure 2: Multivariable Cox Regression - Diesease free survival (DFS)
Median potential follow-up time (months)
Group	Median Time	Lower 95%-CI	Upper 95%-CI	25% Failures	75% Failures
Inflamed: High	41.13	26.53	71.07	25.9	89
Inflamed: Low	59.33	35.93	69.67	29.47	82.67
Uninflamed	65.97	45.73	81.9	25.43	86.07
Combined	60.4	45.73	69.67	26.53	86.07
Model Selection:
1) Step One: Univariable Cox-Regressions
Source	LogWorth	PValue	AICc	BIC
pN-Stage Summary	7.253	0	950.211	956.608	Included Variables: p≤0.20
pT-Stage Summary	5.794	0	956.928	963.325
Immunetyper-Cluster	5.248	1e-05	959.442	965.839
Lymphocascular Invasion	5.877	0	958.185	961.395
Gender	1.13	0.07411	978.377	981.587
Perineurial Sheath Invasion	2.801	0.00158	971.583	974.793
WHO 1973 Grading	2.886	0.0013	971.224	974.433
Blood Vessel Invasion	3.037	0.00092	970.581	973.79
Resection margin	0.941	0.11443	979.075	982.284
Adjuvant chemotherapy	1.204	0.06253	978.098	981.307
MDACC	1.233	0.05849	978.212	987.775
Concomitant CIS	1.048	0.08945	978.682	981.892
Age	0.25	0.56296	981.232	984.442	Dropped variables: p>0.20
WHO Grading 2016	0	1	All tumors were high grade (no parameter estimation possible)
2) Step Two: Backward selection; Multivariable Cox-Regression of included variables with p≤0.20 derived by univariable Cox-Regression
Multivariable Cox-Regression: Events (n): 105; Censorings (n): 82; Total (n): 187
Source	LogWorth	PValue	AICc	BIC
Immunetyper-Cluster	3.355	0.00044	932.668	983.975	Included Variables: p≤0.10
pN-Stage Summary	2.967	0.00108
pT-Stage Summary	2.917	0.00121
WHO 1973 Grading	1.226	0.05945
Gender	0.681	0.20832			Dropped variables: p>0.10
Adjuvant chemotherapy	0.404	0.39422
Lymphocascular Invasion	0.392	0.40506
MDACC	0.224	0.59659
Resection margin	0.185	0.6531
Perineurial Sheath Invasion	0.166	0.68288
Blood Vessel Invasion	0.058	0.87585
Concomitant CIS	0.006	0.98582
3) Step Three: Forward selection of significant variables from multivariable analysis (step 2 model) and non-significant variables from univariable analysis (step 1)
Multivariable Cox-Regression: Events (n): 105; Censorings (n): 82; Total (n): 187
Source	LogWorth	PValue	AICc	BIC
Immunetyper-Cluster	4.788	2e-05	917.409	942.449	Included Variables: p≤0.10
pN-Stage Summary	4.323	5e-05
pT-Stage Summary	4.246	6e-05
WHO 1973 Grading	1.257	0.05538
Age	0.234	0.58318			Dropped variables: p>0.10
4) Step four: Fitting of the final multivariable Model
Multivariable Cox-Regression: Events (n): 105; Censorings (n): 82; Total (n): 187
					Effect Likelihood Ratio Tests				Effect Wald Tests
Source	LogWorth	PValue	AICc	BIC	Nparm	DF	L-R ChiSquare	Prob>ChiSq	Nparm	DF	Wald ChiSquare	Prob>ChiSq
Immunetyper-Cluster	4.725	2e-05	915.527	937.519	2	2	21.7596	<.0001	2	2	19.5788	<.0001
pN-Stage Summary	4.316	5e-05			2	2	19.8754	<.0001	2	2	22.867	<.0001
pT-Stage Summary	4.223	6e-05			2	2	19.4472	<.0001	2	2	21.4028	<.0001
WHO 1973 Grading	1.262	0.05475			1	1	3.68973	0.0547	1	1	1.02688e-06	0.9992
Model	-LogLikelihood	ChiSquare	DF	Prob>Chisq
Difference	39.3219	78.6437	7	<.0001
Full	450.451
Reduced	489.772
Parameter Estimates
Term	Estimate	Std Error	Lower 95%	Upper 95%
pT-Stage Summary[pT3-pT2]	0.198558	0.269191	-0.315816	0.745008
pT-Stage Summary[pT4-pT3]	0.977944	0.238094	0.50583	1.44212
pN-Stage Summary[pN+]	-0.0980762	0.149926	-0.393421	0.197356
pN-Stage Summary[pN0]	-0.696746	0.150239	-0.989957	-0.398745
WHO 1973 Grading[G3-G2]	20.4862	20216.3	-39602.7	39643.7
Immunetyper-Cluster[Inflamed: High]	-0.55707	0.209855	-1.00134	-0.171208
Immunetyper-Cluster[Inflamed: Low]	-0.0896796	0.17459	-0.438532	0.25036
Mutlivariable Hazard Ratios
pT-Stage
Level1	/Level2	Hazard Ratio	Prob>Chisq	Lower 95%	Upper 95%
pT3	pT2	1.21964	0.4559	0.729194	2.10646
pT4	pT2	3.24301	<.0001	1.81925	5.8942
pT4	pT3	2.65898	<.0001	1.65836	4.22965
pT2	pT3	0.819913	0.4559	0.474731	1.37138
pT2	pT4	0.308356	<.0001	0.169658	0.549676
pT3	pT4	0.376083	<.0001	0.236426	0.603005
pN-Stage
Level1	/Level2	Hazard Ratio	Prob>Chisq	Lower 95%	Upper 95%
pN0	pN+	0.549542	0.0084	0.355422	0.855927
pNX	pN+	2.4422	0.0094	1.26174	4.47501
pNX	pN0	4.44406	<.0001	2.2924	8.1385
pN+	pN0	1.8197	0.0084	1.16832	2.81356
pN+	pNX	0.409467	0.0094	0.223463	0.792559
pN0	pNX	0.22502	<.0001	0.122873	0.436225
Immune Typer
Level1	/Level2	Hazard Ratio	Prob>Chisq	Lower 95%	Upper 95%
Inflamed: Low	Inflamed: High	1.59582	0.1908	0.792266	3.2144
Uninflamed	Inflamed: High	3.33283	0.0001	1.7911	6.20162
Uninflamed	Inflamed: Low	2.08847	0.0026	1.29367	3.37155
Inflamed: High	Inflamed: Low	0.626635	0.1908	0.3111	1.2622
Inflamed: High	Uninflamed	0.300046	0.0001	0.161248	0.558316
Inflamed: Low	Uninflamed	0.47882	0.0026	0.2966	0.772992
Grading WHO 1973
Level1	/Level2	Hazard Ratio	Prob>Chisq	Lower 95%	Upper 95%
G3	G2	>10	0.9992	0.958758	.
G2	G3	1.2676e-09	0.9992	.	1.04302

## Sheet: Fig4_OS_Immunetyper_TCGA
Ad Figure 4: Multivariable Cox Regression - Overall survival (OS)
Median potential follow-up time (months)
Group	Median Time	Lower 95%-CI	Upper 95%-CI	25% Failures	75% Failures
Inflamed: High	38.99	27.98	56.15	20.32	66.64
Inflamed: Low	24.92	19.33	30.28	15.95	60.16
Uninflamed	28.7	19.13	38.6	13.48	58.72
Combined	29.36	26.24	36.43	16.14	64.01
Model Selection:
1) Step One: Univariable Cox-Regressions
Source	LogWorth	PValue	AICc	BIC
pN-Summary	5.81	0	1854.82	1862.8	Included Variables: p≤0.20
Age	4.703	2e-05	1861.35	1865.35
Lymphovascular Invasion	4.244	6e-05	1862.03	1870.01
pT-Stage	3.614	0.00024	1864.07	1879.99
TCGA mRNA Cluster	3.369	0.00043	1865.3	1881.23
cM-Stage	2.551	0.00281	1869.83	1877.81
Immune-Typer	1.667	0.02154	1873.9	1881.88
Grading WHO 2016	1.339	0.04581	1875.41	1883.39
Adjuvant Chemotherapy	1.738	0.01829	1873.99	1877.98
Gender	0.294	0.50851	1879.12	1883.11	Dropped variables: p>0.20
2) Step Two: Backward selection; Multivariable Cox-Regression of included variables with p≤0.20 derived by univariable Cox-Regression
Multivariable Cox-Regression: Events (n): 177; Censorings (n): 230; Total (n): 407
Source	LogWorth	PValue	AICc	BIC
Adjuvant Chemotherapy	3.767	0.00017	1802.52	1880.47	Included Variables: p≤0.10
TCGA mRNA Cluster	3.13	0.00074
Immune-Typer	3.07	0.00085
Age	2.533	0.00293
pT-Stage	2.015	0.00966
pN-Summary	1.859	0.01384
Lymphovascular Invasion	1.698	0.02006
cM-Stage	1.26	0.05491
Grading WHO 2016	0	0.99921			Dropped variables: p>0.10
3) Step Three: Forward selection of significant variables from multivariable analysis (step 2 model) and non-significant variables from univariable analysis (step 1)
Multivariable Cox-Regression: Events (n): 177; Censorings (n): 230; Total (n): 407
Source	LogWorth	PValue	AICc	BIC
Adjuvant Chemotherapy	4.108	8e-05	1802.41	1876.56	Included Variables: p≤0.10
TCGA mRNA Cluster	3.462	0.00035
Immune-Typer	3.316	0.00048
pT-Stage	2.673	0.00212
Age	2.473	0.00336
pN-Summary	1.863	0.01372
Lymphovascular Invasion	1.673	0.02126
cM-Stage	1.173	0.06717
Gender	0.404	0.39452			Dropped variables: p>0.10
4) Step four: Fitting of the final multivariable Model
Multivariable Cox-Regression: Events (n): 177; Censorings (n): 230; Total (n): 407
					Effect Likelihood Ratio Tests				Effect Wald Tests
Source	LogWorth	PValue	AICc	BIC	Nparm	DF	L-R ChiSquare	Prob>ChiSq	Nparm	DF	Wald ChiSquare	Prob>ChiSq
Adjuvant Chemotherapy	4.194	6e-05	1800.93	1871.28	1	1	15.9805	<.0001	1	1	14.3223	0.0002
TCGA mRNA Cluster	3.451	0.00035			4	4	20.7555	0.0004	4	4	20.2837	0.0004
Immune-Typer	3.25	0.00056			2	2	14.9682	0.0006	2	2	14.7991	0.0006
pT-Stage	2.6	0.00251			4	4	16.412	0.0025	4	4	13.2946	0.0099
Age	2.572	0.00268			1	1	9.01544	0.0027	1	1	8.68488	0.0032
pN-Summary	1.796	0.01598			2	2	8.27231	0.016	2	2	8.59927	0.0136
Lymphovascular Invasion	1.701	0.01989			2	2	7.83544	0.0199	2	2	7.47857	0.0238
cM-Stage	1.198	0.06333			2	2	5.51877	0.0633	2	2	5.58176	0.0614
Model	-LogLikelihood	ChiSquare	DF	Prob>Chisq
Difference	57.1903	114.38	18	<.0001
Full	881.582
Reduced	938.773
Parameter Estimates
Term	Estimate	Std Error	Lower 95%	Upper 95%
pT-Stage[pT2]	3.82581	6207.8	-12163.2	12170.9
pT-Stage[pT3]	4.31895	6207.8	-12162.8	12171.4
pT-Stage[pT4]	4.81588	6207.8	-12162.3	12171.9
Lymphovascular Invasion[L0]	-0.355202	0.132286	-0.620491	-0.100786
Lymphovascular Invasion[L1]	0.241617	0.126289	-0.007177	0.48832
pN-Summary[pN+]	0.0211685	0.142676	-0.256232	0.303894
pN-Summary[pN0]	-0.367363	0.125281	-0.610852	-0.118394
cM-Stage[M0]	-0.335587	0.155505	-0.629044	-0.013666
cM-Stage[M1]	0.340432	0.256619	-0.214105	0.804914
Adjuvant Chemotherapy[No]	0.419153	0.110756	0.208331	0.64381
TCGA mRNA Cluster[Basal_squamous]	0.31561	0.146956	0.026422	0.603522
TCGA mRNA Cluster[Luminal]	-0.107854	0.232806	-0.593791	0.324979
TCGA mRNA Cluster[Luminal_infiltrated]	0.0632948	0.168606	-0.273161	0.389479
TCGA mRNA Cluster[Luminal_papillary]	-0.688068	0.17758	-1.04263	-0.344895
Immune-Typer[Inflamed: High]	-0.466642	0.128862	-0.722638	-0.216512
Immune-Typer[Inflamed: Low]	0.0352627	0.113498	-0.191086	0.254651
Per unit change in regressor
Term	Risk Ratio	Lower 95%	Upper 95%	Reciprocal
Age	1.02514	1.00856	1.04245	0.975478
Per change in regressor over entire range
Term	Risk Ratio	Lower 95%	Upper 95%	Reciprocal
Age	4.01631	1.61166	10.2598	0.248985
Lymphovascular Invasion
Level1	/Level2	Hazard Ratio	Prob>Chisq	Lower 95%	Upper 95%
L1	L0	1.81633	0.0082	1.16623	2.85245
LX	L0	1.59806	0.0336	1.03711	2.47752
LX	L1	0.879826	0.5429	0.579971	1.32714
L0	L1	0.55056	0.0082	0.350576	0.857461
L0	LX	0.62576	0.0336	0.403629	0.964222
L1	LX	1.13659	0.5429	0.753499	1.72422
pN-Stage
Level1	/Level2	Hazard Ratio	Prob>Chisq	Lower 95%	Upper 95%
pN0	pN+	0.678052	0.0469	0.461834	0.994607
pNX	pN+	1.38407	0.2949	0.745353	2.46867
pNX	pN0	2.04124	0.0162	1.14837	3.46648
pN+	pN0	1.47481	0.0469	1.00542	2.16528
pN+	pNX	0.722508	0.2949	0.405077	1.34165
pN0	pNX	0.489898	0.0162	0.288477	0.8708
Immune Typer
Level1	/Level2	Hazard Ratio	Prob>Chisq	Lower 95%	Upper 95%
Inflamed: Low	Inflamed: High	1.65186	0.0139	1.10765	2.46794
Uninflamed	Inflamed: High	2.45474	0.0001	1.54955	3.89574
Uninflamed	Inflamed: Low	1.48604	0.0581	0.986581	2.2475
Inflamed: High	Inflamed: Low	0.605377	0.0139	0.405196	0.90281
Inflamed: High	Uninflamed	0.407375	0.0001	0.25669	0.645348
Inflamed: Low	Uninflamed	0.672928	0.0581	0.444938	1.0136
Adjuvant Chemotherapy
Level1	/Level2	Hazard Ratio	Prob>Chisq	Lower 95%	Upper 95%
Yes	No	0.432443	<.0001	0.275927	0.659244
No	Yes	2.31244	<.0001	1.51689	3.62415
cM-Stage
Level1	/Level2	Hazard Ratio	Prob>Chisq	Lower 95%	Upper 95%
M1	M0	1.96603	0.1129	0.839032	4.06094
MX	M0	1.392	0.0427	1.01082	1.9259
MX	M1	0.708024	0.3941	0.348616	1.63907
M0	M1	0.508638	0.1129	0.246249	1.19185
M0	MX	0.718391	0.0427	0.519237	0.989292
M1	MX	1.41238	0.3941	0.6101	2.86849
TCGA mRNA Subtype
Level1	/Level2	Hazard Ratio	Prob>Chisq	Lower 95%	Upper 95%
Luminal	Basal_squamous	0.654775	0.1541	0.358615	1.19552
Luminal_infiltrated	Basal_squamous	0.777	0.2145	0.519747	1.16158
Luminal_infiltrated	Luminal	1.18667	0.5914	0.631147	2.23114
Luminal_papillary	Basal_squamous	0.366529	<.0001	0.226039	0.594337
Luminal_papillary	Luminal	0.559778	0.0884	0.293423	1.06792
Luminal_papillary	Luminal_infiltrated	0.471723	0.0057	0.276998	0.803337
Neuronal	Basal_squamous	1.10673	0.7572	0.584534	2.09542
Neuronal	Luminal	1.69024	0.1917	0.77245	3.6985
Neuronal	Luminal_infiltrated	1.42436	0.3125	0.726767	2.79154
Neuronal	Luminal_papillary	3.01948	0.0021	1.57708	5.7811
Basal_squamous	Luminal	1.52724	0.1541	0.836458	2.78851
Basal_squamous	Luminal_infiltrated	1.287	0.2145	0.860895	1.92402
Luminal	Luminal_infiltrated	0.842697	0.5914	0.448201	1.58442
Basal_squamous	Luminal_papillary	2.7283	<.0001	1.68255	4.42401
Luminal	Luminal_papillary	1.78642	0.0884	0.9364	3.40805
Luminal_infiltrated	Luminal_papillary	2.11989	0.0057	1.24481	3.61013
Basal_squamous	Neuronal	0.903566	0.7572	0.477232	1.71077
Luminal	Neuronal	0.591633	0.1917	0.27038	1.29458
Luminal_infiltrated	Neuronal	0.702071	0.3125	0.358226	1.37596
Luminal_papillary	Neuronal	0.331183	0.0021	0.172978	0.634084
pT-Stage
Level1	/Level2	Hazard Ratio	Prob>Chisq	Lower 95%	Upper 95%
pT3	pT2	1.63745	0.0145	1.09008	2.45965
pT4	pT2	2.69142	0.0003	1.57918	4.58704
pT4	pT3	1.64367	0.0277	1.07082	2.52298
pTX	pT2	1.49682	0.2754	0.736435	3.04233
pTX	pT3	0.914121	0.7953	0.461847	1.80929
pTX	pT4	0.556146	0.1255	0.258165	1.19807
pT2	pT3	0.610707	0.0145	0.406562	0.91736
pT2	pT4	0.371551	0.0003	0.218005	0.633242
pT3	pT4	0.608395	0.0277	0.396357	0.933865
pT2	pTX	0.668082	0.2754	0.328695	1.35789
pT3	pTX	1.09395	0.7953	0.552702	2.16522
pT4	pTX	1.79809	0.1255	0.834678	3.8735

## Sheet: Fig4_DFS_Immunetyper_TCGA
Ad Figure 4: Multivariable Cox Regression - Disease free survival (DFS)
Median potential follow-up time (months)
Group	Median Time	Lower 95%-CI	Upper 95%-CI	25% Failures	75% Failures
Inflamed: High	33.04	25.94	47.84	17.75	59.38
Inflamed: Low	22.72	18.81	26.96	12.92	50.7
Uninflamed	19	15.32	29.36	12.1	50.56
Combined	25.02	20.28	28.41	13.58	56.15
Model Selection:
1) Step One: Univariable Cox-Regressions
Source	LogWorth	PValue	AICc	BIC
pN-Summary	9.15	0	1815.4	1823.39	Included Variables: p≤0.20
pT-Stage	4.719	2e-05	1835.01	1846.98
cM-Stage	4.304	5e-05	1837.72	1845.71
Lymphovascular Invasion	4.068	9e-05	1838.81	1846.79
TCGA mRNA Cluster	2.463	0.00344	1845.9	1861.84
Immune-Typer	1.525	0.02984	1850.52	1858.5
Age	1.183	0.06559	1852.13	1856.13
Grading WHO 2016	1.098	0.07978	1852.48	1860.47
Gender	0.164	0.68504	1855.36	1859.35	Dropped variables: p>0.20
Adjuvant Chemotherapy	0.097	0.80031	1855.46	1859.45
2) Step Two: Backward selection; Multivariable Cox-Regression of included variables with p≤0.20 derived by univariable Cox-Regression
Multivariable Cox-Regression: Events (n): 173; Censorings (n): 234; Total (n): 407
Source	LogWorth	PValue	AICc	BIC
pN-Summary	2.617	0.00241	1801.88	1872.28	Included Variables: p≤0.10
Immune-Typer	2.236	0.00581
pT-Stage	1.834	0.01465
TCGA mRNA Cluster	1.633	0.02326
cM-Stage	1.094	0.0805
Lymphovascular Invasion	0.99	0.10227			Dropped variables: p>0.10
Age	0.858	0.13873
Grading WHO 2016	0.073	0.84518
3) Step Three: Forward selection of significant variables from multivariable analysis (step 2 model) and non-significant variables from univariable analysis (step 1)
Multivariable Cox-Regression: Events (n): 173; Censorings (n): 234; Total (n): 407
Source	LogWorth	PValue	AICc	BIC
pN-Summary	5.056	1e-05	1797.99	1856.89	Included Variables: p≤0.10
pT-Stage	2.724	0.00189
Immune-Typer	2.254	0.00558
TCGA mRNA Cluster	1.703	0.01982
Adjuvant Chemotherapy	1.214	0.06107
cM-Stage	1.023	0.09489
Gender	0.487	0.32612			Dropped variables: p>0.10
4) Step four: Fitting of the final multivariable Model
Multivariable Cox-Regression: Events (n): 173; Censorings (n): 234; Total (n): 407
					Effect Likelihood Ratio Tests				Effect Wald Tests
Source	LogWorth	PValue	AICc	BIC	Nparm	DF	L-R ChiSquare	Prob>ChiSq	Nparm	DF	Wald ChiSquare	Prob>ChiSq
pN-Summary	4.969	1e-05	1796.79	1851.85	2	2	22.8832	<.0001	2	2	22.547	<.0001
pT-Stage	2.621	0.00239			3	3	14.4157	0.0024	3	3	13.9156	0.003
Immune-Typer	2.156	0.00698			2	2	9.92812	0.007	2	2	9.75804	0.0076
TCGA mRNA Cluster	1.708	0.01958			4	4	11.7174	0.0196	4	4	11.6028	0.0206
Adjuvant Chemotherapy	1.241	0.05745			1	1	3.60955	0.0574	1	1	3.43901	0.0637
cM-Stage	1.085	0.08222			2	2	4.99679	0.0822	2	2	5.659	0.059
Model	-LogLikelihood	ChiSquare	DF	Prob>Chisq
Difference	42.8938	85.7877	14	<.0001
Full	883.861
Reduced	926.755
Parameter Estimates
Term	Estimate	Std Error	Lower 95%	Upper 95%
pT-Stage[pT2]	-0.567448	0.156141	-0.88108	-0.267057
pT-Stage[pT3]	-0.0424968	0.126319	-0.288794	0.207264
pT-Stage[pT4]	0.325599	0.178512	-0.032962	0.668701
pN-Summary[pN+]	0.245858	0.129754	-0.006602	0.502893
pN-Summary[pN0]	-0.535557	0.120007	-0.770601	-0.298948
cM-Stage[M0]	-0.362688	0.154356	-0.656511	-0.046872
cM-Stage[M1]	0.54111	0.247841	0.0120547	0.99461
Adjuvant Chemotherapy[No]	0.18119	0.0977052	-0.005598	0.378336
TCGA mRNA Cluster[Basal_squamous]	0.196748	0.145764	-0.090553	0.481979
TCGA mRNA Cluster[Luminal]	0.0932341	0.22221	-0.370518	0.506334
TCGA mRNA Cluster[Luminal_infiltrated]	-0.0816552	0.179789	-0.444091	0.26301
TCGA mRNA Cluster[Luminal_papillary]	-0.515236	0.172271	-0.856307	-0.179895
Immune-Typer[Inflamed: High]	-0.382679	0.1303	-0.642027	-0.130281
Immune-Typer[Inflamed: Low]	0.0283836	0.115553	-0.2023	0.251515
pN-Stage
Level1	/Level2	Hazard Ratio	Prob>Chisq	Lower 95%	Upper 95%
pN0	pN+	0.457758	<.0001	0.319803	0.65376
pNX	pN+	1.04482	0.8755	0.593642	1.77764
pNX	pN0	2.28246	0.0032	1.33172	3.7869
pN+	pN0	2.18456	<.0001	1.52961	3.12692
pN+	pNX	0.957106	0.8755	0.562545	1.68452
pN0	pNX	0.438123	0.0032	0.264068	0.75091
Immune Typer
Level1	/Level2	Hazard Ratio	Prob>Chisq	Lower 95%	Upper 95%
Inflamed: Low	Inflamed: High	1.50842	0.047	1.00548	2.26718
Uninflamed	Inflamed: High	2.0896	0.0019	1.31361	3.33478
Uninflamed	Inflamed: Low	1.38529	0.1253	0.913438	2.10957
Inflamed: High	Inflamed: Low	0.662945	0.047	0.441077	0.994553
Inflamed: High	Uninflamed	0.47856	0.0019	0.29987	0.76126
Inflamed: Low	Uninflamed	0.721869	0.1253	0.474029	1.09477
Adjuvant Chemotherapy
Level1	/Level2	Hazard Ratio	Prob>Chisq	Lower 95%	Upper 95%
Yes	No	0.696018	0.0574	0.469226	1.01126
No	Yes	1.43674	0.0574	0.988866	2.13117
cM-Stage
Level1	/Level2	Hazard Ratio	Prob>Chisq	Lower 95%	Upper 95%
M1	M0	2.46896	0.0319	1.08882	5.04724
MX	M0	1.20234	0.2651	0.869869	1.66812
MX	M1	0.48698	0.0747	0.244967	1.0815
M0	M1	0.405029	0.0319	0.198128	0.918422
M0	MX	0.831714	0.2651	0.599478	1.1496
M1	MX	2.05347	0.0747	0.924643	4.08218
TCGA mRNA Subtype
Level1	/Level2	Hazard Ratio	Prob>Chisq	Lower 95%	Upper 95%
Luminal	Basal_squamous	0.901663	0.7256	0.50345	1.61485
Luminal_infiltrated	Basal_squamous	0.756991	0.1989	0.491896	1.16495
Luminal_infiltrated	Luminal	0.83955	0.5937	0.443872	1.58795
Luminal_papillary	Basal_squamous	0.490669	0.0025	0.308682	0.779951
Luminal_papillary	Luminal	0.544183	0.0576	0.298034	0.993629
Luminal_papillary	Luminal_infiltrated	0.648184	0.117	0.378733	1.10934
Neuronal	Basal_squamous	1.11646	0.7405	0.585055	2.13053
Neuronal	Luminal	1.23822	0.5869	0.574457	2.66893
Neuronal	Luminal_infiltrated	1.47486	0.2863	0.73249	2.96962
Neuronal	Luminal_papillary	2.27538	0.0242	1.16017	4.46256
Basal_squamous	Luminal	1.10906	0.7256	0.619253	1.98629
Basal_squamous	Luminal_infiltrated	1.32102	0.1989	0.858404	2.03295
Luminal	Luminal_infiltrated	1.19111	0.5937	0.629744	2.2529
Basal_squamous	Luminal_papillary	2.03803	0.0025	1.28213	3.23958
Luminal	Luminal_papillary	1.83762	0.0576	1.00641	3.35533
Luminal_infiltrated	Luminal_papillary	1.54277	0.117	0.901439	2.64039
Basal_squamous	Neuronal	0.89569	0.7405	0.469367	1.70924
Luminal	Neuronal	0.807611	0.5869	0.374682	1.74077
Luminal_infiltrated	Neuronal	0.67803	0.2863	0.336744	1.36521
Luminal_papillary	Neuronal	0.439488	0.0242	0.224086	0.861942
pT-Stage
Level1	/Level2	Hazard Ratio	Prob>Chisq	Lower 95%	Upper 95%
pT3	pT2	1.69038	0.0096	1.13332	2.57065
pT4	pT2	2.44256	0.0014	1.41907	4.17675
pT4	pT3	1.44498	0.1076	0.920487	2.2152
pTX	pT2	2.34385	0.0095	1.24077	4.28372
pTX	pT3	1.38658	0.2895	0.747238	2.44286
pTX	pT4	0.959586	0.906	0.475315	1.88263
pT2	pT3	0.591584	0.0096	0.389006	0.882366
pT2	pT4	0.409406	0.0014	0.23942	0.704686
pT3	pT4	0.692051	0.1076	0.451427	1.08638
pT2	pTX	0.426649	0.0095	0.233442	0.805953
pT3	pTX	0.721197	0.2895	0.409357	1.33826
pT4	pTX	1.04212	0.906	0.531173	2.10387

## Sheet: Fig5_OS_Adjuvant_CT
Ad Figure 5: Multivariable Cox Regression - Overall survival (OS)
Median potential follow-up time (months)
Group	Median Time	Lower 95%-CI	Upper 95%-CI	25% Failures	75% Failures
Inflamed: High	53.88	32.33	59.38	27.35	75.39
Inflamed: Low	50.7	29.79	77.97	25.4	77.97
Uninflamed	38.83	25.41	79.93	25.41	79.93
Combined	52.01	37.05	58.92	25.94	77.97
Model Selection:
1) Step One: Univariable Cox-Regressions
Source	LogWorth	PValue	AICc	BIC
Immune Typer	2.834	0.00147	545.795	551.353	Included Variables: p≤0.20
Age	1.108	0.07792	553.672	556.467
pN-Stage	1.656	0.0221	551.326	559.613
Lymphovascular Invasion	0.9	0.12595	554.701	560.26
MDACC Subtyping	0.359	0.43765	558.23	566.517	Dropped variables: p>0.20
pT-Stage	0.43	0.37167	557.813	566.1
Gender	0.354	0.44217	556.189	558.985
WHO Grading 2016	0	1	All tumors were high grade (no parameter estimation possible)
2) Step Two: Backward selection; Multivariable Cox-Regression of included variables with p≤0.20 derived by univariable Cox-Regression
Multivariable Cox-Regression: Events (n): 64; Censorings (n): 61; Total (n): 125
Source	LogWorth	PValue	AICc	BIC
Immune Typer	2.221	0.00601	548.266	569.651	Included Variables: p≤0.15
Age	0.903	0.12491
pN-Stage	0.499	0.31706			Dropped variables: p>0.15
Lymphovascular Invasion	0.176	0.6672
3) Step Three: Forward selection of significant variables from multivariable analysis (step 2 model) and non-significant variables from univariable analysis (step 1)
Multivariable Cox-Regression: Events (n): 64; Censorings (n): 61; Total (n): 125
Source	LogWorth	PValue	AICc	BIC
Immune Typer	3.031	0.00093	553.779	580.132	Included Variables: p≤0.10
Age	1.298	0.05031
pT-Stage	0.754	0.17608			Dropped variables: p>0.10
MDACC Subtyping	0.357	0.43953
Gender	0.105	0.7853
4) Step four: Fitting of the final multivariable Model
Multivariable Cox-Regression: Events (n): 64; Censorings (n): 61; Total (n): 125
					Effect Likelihood Ratio Tests				Effect Wald Tests
Source	LogWorth	PValue	AICc	BIC	Nparm	DF	L-R ChiSquare	Prob>ChiSq	Nparm	DF	Wald ChiSquare	Prob>ChiSq
Immune Typer	2.827	0.00149	544.818	553.104	2	2	13.02	0.0015	2	2	11.8703	0.0026
Age	1.1	0.07938			1	1	3.07748	0.0794	1	1	2.98829	0.0839
Model	-LogLikelihood	ChiSquare	DF	Prob>Chisq
Difference	8.0638	16.1277	3	0.0011
Full	269.31
Reduced	277.373
Parameter Estimates
Term	Estimate	Std Error	Lower 95%	Upper 95%
Age	0.0221319	0.0128029	-0.002558	0.0477336
Immune Typer[Inflamed: High]	-0.658953	0.203425	-1.0825	-0.278701
Immune Typer[Inflamed: Low]	0.134233	0.171154	-0.205485	0.469038
Per unit change in regressor
Term	Risk Ratio	Lower 95%	Upper 95%	Reciprocal
Age	1.02238	0.997446	1.04889	0.978111
Per change in regressor over entire range
Term	Risk Ratio	Lower 95%	Upper 95%	Reciprocal
Age	2.59004	0.895849	7.78771	0.386095
Immune Typer
Level1	/Level2	Hazard Ratio	Prob>Chisq	Lower 95%	Upper 95%
Inflamed: Low	Inflamed: High	2.21043	0.013	1.17841	4.33915
Uninflamed	Inflamed: High	3.26635	0.0005	1.67932	6.56734
Uninflamed	Inflamed: Low	1.4777	0.1787	0.833248	2.58831
Inflamed: High	Inflamed: Low	0.452401	0.013	0.23046	0.848599
Inflamed: High	Uninflamed	0.306152	0.0005	0.152269	0.595478
Inflamed: Low	Uninflamed	0.676728	0.1787	0.386352	1.20012

## Sheet: Fig5_DFS_Adjuvant_CT
Ad Figure 5: Multivariable Cox Regression - Disease free survival (DFS)
Median potential follow-up time (months)
Group	Median Time	Lower 95%-CI	Upper 95%-CI	25% Failures	75% Failures
Inflamed: High	54.21	27.35	59.38	25.94	71.07
Inflamed: Low	54.9	25.27	110.6	25.27	86.3
Uninflamed	38.6	12.66	81.9	12.66	81.9
Combined	54.21	38.6	62.86	21.53	77.97
Model Selection:
1) Step One: Univariable Cox-Regressions
Source	LogWorth	PValue	AICc	BIC
Immune Typer	2.192	0.00643	636.509	642.067	Included Variables: p≤0.20
pN-Stage	1.519	0.0303	639.778	648.065
Lymphovascular Invasion	0.949	0.11251	642.234	647.793
pT-Stage	0.905	0.12436	642.952	651.239
MDACC Subtyping	0.416	0.38349	645.65	653.937	Dropped variables: p>0.20
Age	0.399	0.39901	643.826	646.622
Gender	0.248	0.56487	644.206	647.002
2) Step Two: Backward selection; Multivariable Cox-Regression of included variables with p≤0.20 derived by univariable Cox-Regression
Multivariable Cox-Regression: Events (n): 76; Censorings (n): 49; Total (n): 125
Source	LogWorth	PValue	AICc	BIC
Immune Typer	1.917	0.01209	641.93	668.283	Included Variables: p≤0.10
pT-Stage	0.676	0.21064			Dropped variables: p>0.10
Lymphovascular Invasion	0.337	0.46018
pN-Stage	0.323	0.47492
3) Step Three: Forward selection of significant variables from multivariable analysis (step 2 model) and non-significant variables from univariable analysis (step 1)
Multivariable Cox-Regression: Events (n): 76; Censorings (n): 49; Total (n): 125
Source	LogWorth	PValue	AICc	BIC
Immune Typer	1.636	0.02315	645.935	664.776	Included Variables: p≤0.10
Age	0.32	0.47809			Dropped variables: p>0.10
MDACC Subtyping	0.077	0.83849
Gender	0.023	0.94915
4) Step four: Fitting of the final multivariable Model
Multivariable Cox-Regression: Events (n): 76; Censorings (n): 49; Total (n): 125
					Effect Likelihood Ratio Tests				Effect Wald Tests
Source	LogWorth	PValue	AICc	BIC	Nparm	DF	L-R ChiSquare	Prob>ChiSq	Nparm	DF	Wald ChiSquare	Prob>ChiSq
Immune Typer	2.035	0.00922	637.885	651.522	2	2	9.37343	0.0092	2	2	8.64517	0.0133
pT-Stage	0.771	0.16962			3	3	5.02986	0.1696	3	3	5.18216	0.1589
Model	-LogLikelihood	ChiSquare	DF	Prob>Chisq
Difference	7.5623	15.1247	5	0.0098
Full	313.69
Reduced	321.253
Parameter Estimates
Term	Estimate	Std Error	Lower 95%	Upper 95%
pT-Stage[pT2]	0.0754808	0.273243	-0.488447	0.59811
pT-Stage[pT3]	-0.176672	0.202336	-0.564841	0.237839
pT-Stage[pT4]	0.416177	0.230104	-0.033069	0.877741
Immune Typer[Inflamed: High]	-0.517624	0.17939	-0.8858	-0.178365
Immune Typer[Inflamed: Low]	0.138651	0.165558	-0.189402	0.461794
Immune Typer
Level1	/Level2	Hazard Ratio	Prob>Chisq	Lower 95%	Upper 95%
Inflamed: Low	Inflamed: High	1.9276	0.0233	1.09233	3.49906
Uninflamed	Inflamed: High	2.45125	0.0049	1.31628	4.61646
Uninflamed	Inflamed: Low	1.27166	0.417	0.707489	2.25628
Inflamed: High	Inflamed: Low	0.51878	0.0233	0.285791	0.915477
Inflamed: High	Uninflamed	0.407956	0.0049	0.216616	0.759718
Inflamed: Low	Uninflamed	0.786374	0.417	0.443207	1.41345
Immune Typer
Level1	/Level2	Hazard Ratio	Prob>Chisq	Lower 95%	Upper 95%
pT3	pT2	0.777126	0.4829	0.402724	1.62175
pT4	pT2	1.40593	0.3749	0.669248	3.12511
pT4	pT3	1.80914	0.0344	1.0456	3.09062
pTX	pT2	0.676741	0.4949	0.1864	1.99721
pTX	pT3	0.870825	0.7928	0.257336	2.22317
pTX	pT4	0.481349	0.1547	0.138572	1.28692
pT2	pT3	1.28679	0.4829	0.616617	2.48309
pT2	pT4	0.711275	0.3749	0.319989	1.49421
pT3	pT4	0.55275	0.0344	0.32356	0.956386
pT2	pTX	1.47767	0.4949	0.500699	5.36481
pT3	pTX	1.14834	0.7928	0.449808	3.88597
pT4	pTX	2.0775	0.1547	0.777051	7.21648
