# Supplementary material
Source: HighWire-hosted journal article supplement (https://jitc.bmj.com/content/8/1/e000162)
Supplement: inline-supplementary-material-4 [file inline-supplementary-material-4.xlsx]

## Sheet: Suppl.-Table_1
Supplementary Table 3. Spearman rank correlations between different immune genes in the CCC-EMN MIBC cohort.
Correlations	CD8A	CD3Z	CXCL9
CD8A	1	0.8394	0.8141
CD3Z	0.8394	1	0.7823
CXCL9	0.8141	0.7823	1
Nonparametric: Spearman's ρ
Variable A	Variable B	Spearman ρ	Prob>|ρ|
CD3Z	CD8A	0.7799	<.0001
CXCL9	CD8A	0.7801	<.0001
CXCL9	CD3Z	0.7294	<.0001
Abbreviations
CCC-EMN:	Comprehensive Cancer Center-Erlangen Metropole Region Nuremberg
MIBC:	Muscle-invasive urothelial bladder cancer
